# Supplementary material
Source: MDPI journal article supplement (https://www.mdpi.com/1999-4907/14/5/908)
Supplement: s1 [file s1]

# Seeing trees from drones: the role of leaf phenology transition in mapping species distribution in species-rich montane forests

## *Supplementary Materials*

Meichen Jiang <sup>1,†</sup>, Jiixin Kong <sup>1,†</sup>, Zhaochen Zhang <sup>2</sup>, Jianbo Hu <sup>3</sup>, Yuchu Qin <sup>4</sup>, Kankan Shang <sup>5</sup>, Mingshui  
Zhao <sup>6</sup> and Jian Zhang <sup>1,\*</sup>

<sup>1</sup> Center for Global Change and Complex Ecosystems, Zhejiang Tiantong Forest Ecosystem National  
Observation and Research Station, School of Ecological and Environmental Sciences, East China Normal  
University, Shanghai 200241, China; mcjiang@des.ecnu.edu.cn (M.J.); 18553506836@163.com (J.K.)

<sup>2</sup> Lushan Botanical Garden, Chinese Academy of Sciences, Jiujiang 332900, China; zc.zhang16@gmail.com

<sup>3</sup> Tianjin Research Institute of Water Transport Engineering, Ministry of Transport, Tianjin 300456, China;  
hujb@tiwte.ac.cn

<sup>4</sup> Aerospace Information Research Institute, Chinese Academy of Sciences, Beijing 100101, China;  
qinyc@aircas.ac.cn

<sup>5</sup> Shanghai Chenshan Plant Science Research Center, Chinese Academy of Sciences, Shanghai Chenshan  
Botanical Garden, Shanghai 201602, China; shangkankan@csnbgsh.cn

<sup>6</sup> Tianmushan National Nature Reserve Management Bureau, Hangzhou 311311, China; 973659738@qq.com

\* Correspondence: jzhang@des.ecnu.edu.cn

† These authors contributed equally to this work.

**Table S1.** The separations among tree species, standing dead trees and canopy gaps based on all selected features. The higher the value, the higher the separability of the two species.

|                              | <i>Cryptomeria japonica</i> | <i>Pseudolarix amabilis</i> | <i>Pinus taiwanensis</i> | <i>Ginkgo biloba</i> | <i>Liquidambar acalycina</i> | <i>Litsea auriculata</i> | Standing dead trees |
|------------------------------|-----------------------------|-----------------------------|--------------------------|----------------------|------------------------------|--------------------------|---------------------|
| <i>Pseudolarix amabilis</i>  | 1.08                        |                             |                          |                      |                              |                          |                     |
| <i>Pinus taiwanensis</i>     | 0.35                        | 1.50                        |                          |                      |                              |                          |                     |
| <i>Ginkgo biloba</i>         | 1.14                        | 0.66                        | 2.6425                   |                      |                              |                          |                     |
| <i>Liquidambar acalycina</i> | 1.1011                      | 3.2257                      | 0.9402                   | 3.2257               |                              |                          |                     |
| <i>Litsea auriculata</i>     | 0.8925                      | 0.4533                      | 1.3212                   | 0.8470               | 1.1491                       |                          |                     |
| Standing dead trees          | 3.5121                      | 9.1545                      | 6.2922                   | 5.9192               | 4.6716                       | 6.3402                   |                     |
| Canopy gaps                  | 0.9931                      | 2.7819                      | 0.4419                   | 5.3208               | 0.7716                       | 2.8530                   | 6.8819              |

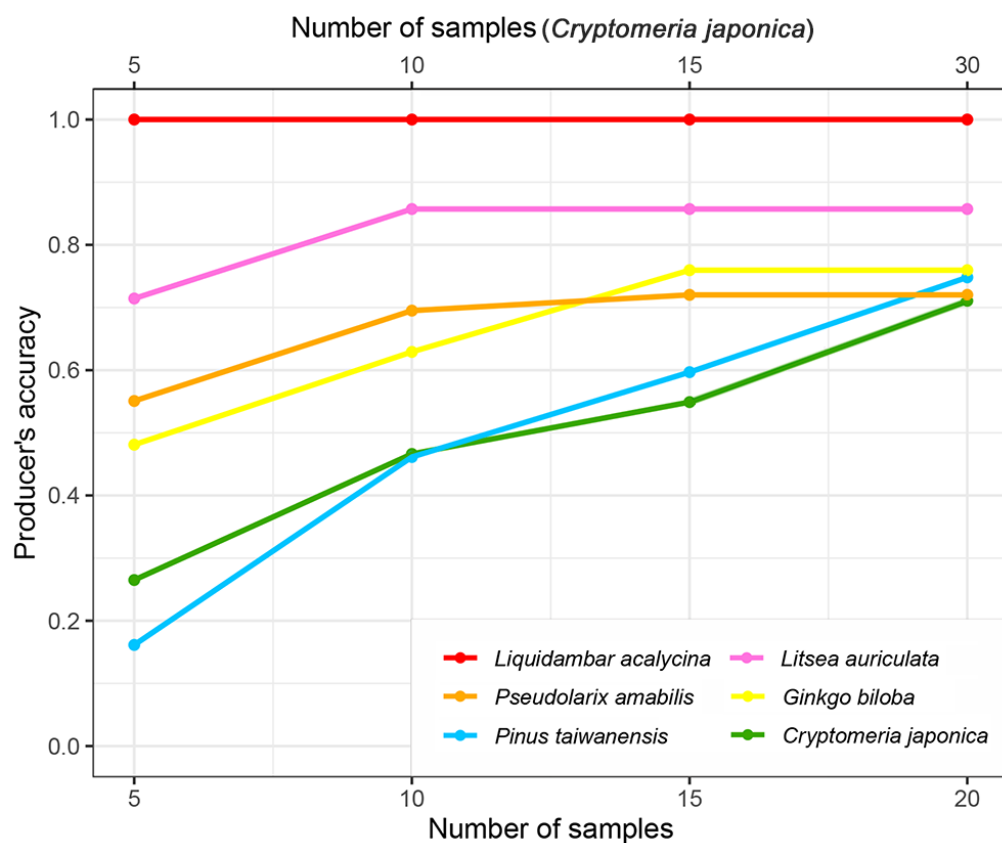

**Figure S1.** The producer's accuracy of the classification for six tree species with different sample sizes. The x-axis on the top is for *Cryptomeria japonica*, and the x-axis on the bottom is for the other five species.

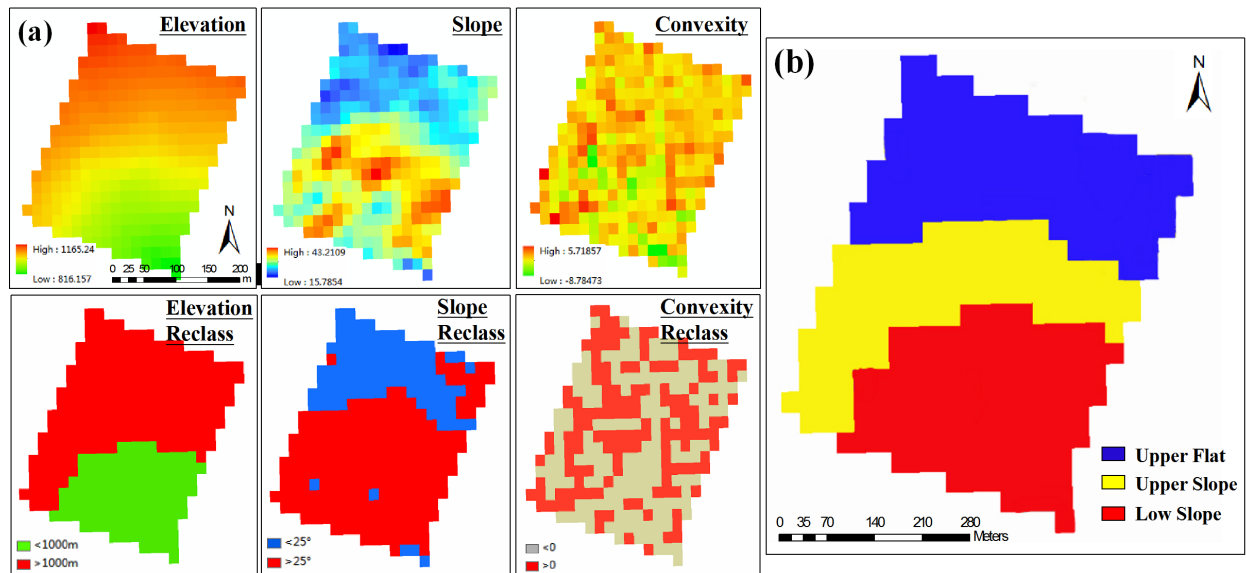

**Figure S2. (a)** The maps of three topographical variables (elevation, slope, and convexity) that taken into consideration for habitat classification. Each variable was reclassified into two levels. The grid size is 30 m × 30 m. **(b)** The map of three habitat types produced based on the elevation and slope.

**Table S2.** The number of samples (including ground-based and visual interpretation-based) for six target tree species, canopy gaps and standing dead trees in the (a) upper flat, (b) upper slope, and (c) low slope.

| <b>Target objects</b>        | <b>Upper flat</b> | <b>Upper slope</b> | <b>Low slope</b> |
|------------------------------|-------------------|--------------------|------------------|
| <i>Liquidambar acalycina</i> | 9                 | 8                  | 31               |
| <i>Ginkgo biloba</i>         | 21                | 21                 | 21               |
| <i>Cryptomeria japonica</i>  | 51                | 38                 | 31               |
| <i>Litsea auriculata</i>     | 9                 | 14                 | 6                |
| <i>Pseudolarix amabilis</i>  | 11                | 11                 | 11               |
| <i>Pinus taiwanensis</i>     | 20                | 20                 | 20               |
| Standing dead trees          | 32                | 14                 | 3                |
| Canopy gaps                  | 25                | 14                 | 13               |

**Table S3. Classification accuracy of three habitat types with spectral and spatial geometric features using the KNN algorithm (without additional reference data).**

| Target objects                | Upper Flat |        | Upper Slope |        | Low Slope |        |
|-------------------------------|------------|--------|-------------|--------|-----------|--------|
|                               | PA (%)     | UA (%) | PA (%)      | UA (%) | PA (%)    | UA (%) |
| <i>Cryptomeria japonica</i>   | 48         | 49.3   | 90.7        | 100    | 95.4      | 100    |
| <i>Pseudolarix amabilis</i>   | 30.4       | 20     | 85.9        | 90.2   | 77.3      | 62.5   |
| <i>Pinus taiwanensis</i>      | 20.4       | 17.6   | 81.1        | 83.3   | 0         | 0      |
| <i>Ginkgo biloba</i>          | 41.3       | 57.1   | 84          | 73.7   | 85.9      | 91.3   |
| <i>Liquidambar acalycina</i>  | 0          | 0      | 100         | 66.7   | 94        | 100    |
| <i>Litsea auriculata</i>      | 78.3       | 44.4   | 77.3        | 54.5   | 100       | 64.3   |
| Standing dead trees           | 90.2       | 65.2   | 100         | 94.4   | 100       | 100    |
| Canopy gap                    | 40.1       | 51.4   | 100         | 91.7   | 100       | 97.9   |
| Overall accuracy (OA, %)      | 50.9       |        | 89          |        | 94.4      |        |
| Cohen's Kappa coefficient (K) | 0.338      |        | 0.845       |        | 0.907     |        |
